RESEARCH ARTICLE

# Deliberate self-harm behavior among young violent offenders

Natalie Laporte<sup>1\*</sup>, Andrejs Ozolins<sup>2</sup>, Sofie Westling<sup>1</sup>, Åsa Westrin<sup>1</sup>, Eva Billstedt<sup>3</sup>, Björn Hofvander<sup>4</sup>, Märta Wallinius<sup>4</sup>

**1** Lund University, Faculty of Medicine, Department of Clinical Sciences Lund, Unit for Clinical Suicide Research, Lund, Sweden, **2** Linneaus University, Department of Psychology, Växjö, Sweden, **3** Sahlgrenska Academy, Institute of Neuroscience and Physiology, Gillberg Neuropsychiatry Centre, Gothenburg, Sweden, **4** Lund University, Faculty of Medicine, Department of Clinical Sciences Lund, Child and Adolescent Psychiatry, Lund, Sweden

\* [natalie.laporte@kronoberg.se](mailto:natalie.laporte@kronoberg.se)

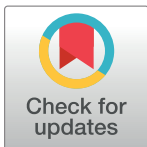

**OPEN ACCESS**

**Citation:** Laporte N, Ozolins A, Westling S, Westrin Å, Billstedt E, Hofvander B, et al. (2017) Deliberate self-harm behavior among young violent offenders. PLoS ONE 12(8): e0182258. <https://doi.org/10.1371/journal.pone.0182258>

**Editor:** Vincenzo DeLuca, University of Toronto, CANADA

**Received:** September 19, 2016

**Accepted:** July 3, 2017

**Published:** August 17, 2017

**Copyright:** © 2017 Laporte et al. This is an open access article distributed under the terms of the [Creative Commons Attribution License](https://creativecommons.org/licenses/by/4.0/), which permits unrestricted use, distribution, and reproduction in any medium, provided the original author and source are credited.

**Data Availability Statement:** Data cannot be made publicly available for ethical reasons, e.g., public availability would compromise patient confidentiality or participant privacy. The data file contains sensitive information, such as place of imprisonment, mental disorders, mental health treatment, illicit drug use, risky behavior, place of birth, and sensitive socioeconomic data, such as occupation or place of work, income, and ethnicity. Thus, public availability would breach patient confidentiality and would be in conflict with the signed consent. Requests on the data file should be sent to [bjorn.hofvander@med.lu.se](mailto:bjorn.hofvander@med.lu.se) or [eva](mailto:eva).

## Abstract

Deliberate self-harm behavior (DSH) can have profound effects on a person's quality of life, and challenges the health care system. Even though DSH has been associated with aggressive interpersonal behaviors, the knowledge on DSH in persons exhibiting such behaviors is scarce. This study aims to (1) specify the prevalence and character of DSH, (2) identify clinical, neurocognitive, psychosocial, and criminological characteristics associated with DSH, and (3) determine predictors of DSH among young violent offenders. Data were collected from a nationally representative cohort of 270 male violent offenders, 18–25 years old, imprisoned in Sweden. Participants were interviewed and investigated neuropsychologically, and their files were reviewed for psychosocial background, criminal history, mental disorders, lifetime aggressive antisocial behaviors, and DSH. A total of 62 offenders (23%) had engaged in DSH at some point during their lifetime, many on repeated occasions, yet without suicidal intent. DSH was significantly associated with attention deficit hyperactivity disorder, mood disorders, anxiety disorders, various substance use disorders, being bullied at school, and repeated exposure to violence at home during childhood. Mood disorders, anxiety disorders, and being bullied at school remained significant predictors of DSH in a total regression model. Violent offenders direct aggressive behaviors not only toward other people, but also toward themselves. Thus, DSH must be assessed and prevented in correctional institutions as early as possible, and more knowledge is needed of the function of DSH among offenders.

## Introduction

Self-harm is a serious self-destructive behavior that implies psychological suffering, can have long-term and profound effects on a person's quality of life, and challenges the health care system [1, 2]. It is also demanding on close friends and family. The risk of completed suicide among people who self-harm is 30 times higher than among those who do not [3].

[billstedt@gnc.gu.se](mailto:billstedt@gnc.gu.se). Contact information to the Regional Ethics Committee who approved the study and restrict the data availability for the study: [registrator@epn.lu.se](mailto:registrator@epn.lu.se). The reference number of the approval is: 2009/405.

**Funding:** The work was supported by the Regional Forensic Psychiatric clinic in Växjö, grants from Region Kronoberg, Södra sjukvårdsregionen, and through the regional agreement on medical training and clinical research (ALF) between the Region Skåne and Lund University. The funders had no role in study design, data collection and analysis, decision to publish, or preparation of the manuscript.

**Competing interests:** The authors have declared that no competing interests exist.

## Definitions

Defining self-harm is a challenge, and a variety of definitions have been proposed. We chose to define deliberate self-harm (DSH) according to Hawton & James as ranging from “behaviors with no suicidal intent (but with the intent to communicate distress or relieve tension) through to suicide” [4] (p. 891). Acts typical of DSH include cutting, burning, biting, scratching or excessively rubbing the skin, self-hitting, head-banging or hitting fists against objects, ingesting a substance, drug, or object and jumping from a height with the intent of causing self-harm [5]. They also include bone-breaking, interfering with wound healing, and hair pulling [6].

## Prevalence

In the general population, the international prevalence of lifetime DSH is estimated at 4% to 13% [7, 8]. Deliberate self-harm is prevalent in all ages, but peaks in adolescence (15–17 years) [9]. In a study sample of 1088 adolescents, DSH was prevalent among 36% [10]. In another study of 1052 adolescents (13–14 years), 42% reported DSH [11]. Previous studies on adolescents have found gender differences in DSH, with a higher prevalence in girls than boys [12]. However, several studies have not found gender differences, and the current view is that self-harm is more common among men than previously thought [13]. In 2012, 804 000 individuals committed suicide worldwide [14]. Suicide rates in prison have been reported to be three to six times higher than in the general population [15, 16]. In one study the risk of suicide was higher in those who self-harmed than in the general prison population, and more than half of the deaths occurred within a month of self-harming [17]. Other studies report that DSH precedes suicide in prison environments in 43% to 50% of cases [18, 19].

## Risk factors

DSH has been associated with general psychopathology [11], and mental disorders have been described as the strongest predictors of suicide attempts [20]. High rates of anxiety, depression, impulse control disorders, and mental retardation have been observed among individuals with DSH in a general population [21, 22]. Substance use disorders (SUD) have also been related to a higher number of self-harm incidents [23]. Several studies have also found a link between attention deficit hyperactivity disorder (ADHD) and DSH [24]. Psychosocial background is also associated with DSH. Studies have found that childhood abuse increases the risk of DSH in adolescence and adulthood [25, 26,27], and recent bullying victimization and expulsion from school have also been associated with DSH [28].

## Aims

DSH is a challenging, self-destructive behavior that has been associated with a variety of mental disorders and early adverse experiences. However, previous research on DSH has mostly targeted a selected population of young, Caucasian women or children and adolescents [29]. As DSH can be viewed as self-inflicted aggressive behavior [30], a (biological) connection to interpersonal aggressive behavior has been suggested and reported [31, 32]. Yet, knowledge about DSH in persons exhibiting interpersonal aggressive behaviors is scarce, especially among offenders past adolescence.

The aims of this study are to

- specify the prevalence and character of DSH among young adult violent male offenders;

- identify clinical, neurocognitive, psychosocial, and criminological characteristics associated with DSH among young adult violent male offenders; and
- determine predictors of DSH among young adult violent male offenders.

## Methods

### Participants

The study cohort were young adult (18–25 years of age) male offenders incarcerated between March 2010 and July 2012 at any of nine correctional facilities in the Western region of the Swedish Prison and Probation Service for committing violent (including “hands-on” sexual) offenses. The region has the full range of prisons, from high-security to open facilities, and serves approximately one fifth of the total national cohort. Because there is only one small, specialized women’s prison in the defined area, female offenders were not included in the study. Exclusion criteria were: poor fluency in Swedish, defined as the need for an interpreter for full participation, and duration of stay in the prison of 4 weeks or less. To assess the representativeness of the included group, demographic information was collected for individuals who were excluded or chose not to participate in the study.

Of a total of 421 offenders, 23 (5%) were excluded because of insufficient language skills and 19 (5%) for insufficient duration of prison stay. Of the remaining 379 offenders, 109 (29%) declined participation in the study, leaving a final study group of 270 participants (71% of all who met inclusion criteria). Age ranged from 18 years and 7 months to 25 years and 11 months, with a mean age of 22.3 years ( $SD = 1.9$ ). Fifteen (14%) had been sentenced for sexual violent crimes, and 94 (86%) for non-sexual violent crimes. Those excluded for insufficient skills in Swedish differed from the participants by having a higher rate of sexual crimes ( $n = 12$ ; 52%). The cohort is considered representative of young adult male violent offenders in the Swedish Prison and Probation Service.

Detailed information on the participants’ psychosocial background has been reported [33]. Of the 270 participants, 196 (73%) were born in Sweden, but 114 (43%) reported that both parents had been born outside of Sweden. At some point in their childhood or adolescence 107 participants (40%) had been placed in an institution, and the majority ( $n = 231$ ; 86%) had been convicted of crimes previously. Mental disorders, including childhood onset mental disorders and SUD, were common but only a few participants had undergone assessment at a child and adolescent psychiatry unit [34, 35].

### Procedures

After receiving oral and written information on the study, eligible offenders were asked for informed consent. A small monetary compensation for time spent in the study was provided (SEK 200, approximately 21€). Participants were assessed consecutively according to a preset protocol that included self-rated questionnaires, semi-structured diagnostic interviews, and neuropsychological assessments. Questionnaires were completed by the participants prior to the clinical assessments, which were subsequently performed over a full day by a licensed psychologist with clinical experience in the field and special training in the instruments used. The assessor had read all the file information on each participant, including prison health care journals, detailed reports on previous living circumstances and criminal history, and incidents during current incarceration that was available from the Swedish Prison and Probation Service. All clinical data were assessed for quality and diagnoses were assigned by consensus between the assessor and one senior clinician and researcher with considerable experience in

the field. Participants who showed signs of an autism spectrum disorder were later offered a specialized clinical, semi-structured diagnostic interview or observational assessment.

## Measures

**DSH.** Information on lifetime DSH was collected from files and interviews, separately for non-suicidal self-injuries (any occasion, nr. of occasions, age at onset, type of self-injury) and suicide attempts (any attempt, nr. of attempts, age at onset, violent attempts, intention of most serious attempt, risk of completed suicide at most serious attempt). A merged variable, DSH, was then created based on the occurrence of either non-suicidal self-injury (NSSI) or suicide attempts.

**Mental disorders.** The lifetime occurrence of categorical diagnoses and dimensional symptoms of mental disorders was assessed according to the Diagnostic and Statistical Manual of Mental Disorders, 4th edition (DSM IV) [36], based on information from the Structured Clinical Interview guides for Axis I and II disorders (SCID I and SCID II) [37, 38] and file information provided by the Swedish Prison and Probation Service. Symptoms of autism spectrum disorders and other neurodevelopmental disorders (e.g., ADHD) were measured using the Asperger syndrome/high functioning autism diagnostic interview [39] and a structured DSM-IV interview protocol that has been used in similar studies [40].

**Cognitive functioning.** The General Ability Index (GAI) [41] from the Wechsler Adult Intelligence Scale—third edition (WAIS-III) [42] was used to assess participants' general intelligence. The GAI consists of two domains: the verbal comprehension index (VCI) measures acquired knowledge and verbal reasoning, and the perceptual organization index (POI) measures visual-motor skills, nonverbal fluid reasoning, and visuospatial organization.

**Psychosocial background.** Information on ethnicity, education, disadvantaged childhood circumstances, institutionalization during childhood, and previous contacts with the mental health care system was obtained from interviews and file information.

**Criminal history.** The structured research protocol was also used to collect data on criminal history. All earlier criminality (including the index offense) was assembled: offenses noted in the files as well as those confessed during the interviews. If the participant reported a younger age of onset and more criminality than noted in the files, the information from the interviews was used if the assessor considered the information credible. Thus, it was possible to include information on onset of criminality before the age of 15, even though this is not officially registered in Sweden.

Lifetime aggressive antisocial behaviors was also investigated through the Life History of Aggression questionnaire (LHA) [43], originally developed for research on neurobiological correlates to aggression. The LHA evaluates the frequency of 11 different types of aggressive and antisocial behaviors, rated on a 5-point scale. The LHA total score equals the sum of the following subscales: Aggression, Self-directed aggression, and Antisocial behavior [44]. The LHA was administered as a clinician-rated instrument, and the assessor based the ratings on all available information from interviews and files.

## Statistical methods

Data was anonymized and coded, then analyzed with IBM SPSS Statistics 22 software. Screening for outliers was performed. When data were skewed, nonparametric statistics were used, Mann-Whitney U test for all analyses. For all continuous variables, Cohen's *d* was calculated and will be presented under each section. A DSH variable was created by merging the groups of self-harming participants and suicide attempters. Due to missing data for some variables, the percentages given in the results section are based on the valid percentages in the analyses.

**Table 1. Associations between mental disorders and deliberate self-harm behavior**

| Mental Disorder                             | Total prevalence (N) | Deliberate Self-Harm Behavior (N) |     |                    | Fischer's Exact <i>p</i> |
|---------------------------------------------|----------------------|-----------------------------------|-----|--------------------|--------------------------|
|                                             |                      | No                                | Yes | Expected Yes-Count |                          |
| Mood disorders                              | 145                  | 90                                | 55  | 34                 | .000                     |
| Anxiety disorders                           | 138                  | 87                                | 50  | 32                 | .000                     |
| Psychotic syndromes                         | 22                   | 13                                | 8   | 5                  | .110                     |
| ADHD in childhood, any                      | 170                  | 122                               | 46  | 40                 | .069                     |
| ADHD in adulthood, any                      | 116                  | 79                                | 37  | 27                 | .005                     |
| Autism spectrum disorders                   | 26                   | 18                                | 7   | 6                  | .620                     |
| Conduct disorder                            | 210                  | 159                               | 49  | 49                 | 1.0                      |
| Antisocial personality disorder             | 170                  | 132                               | 36  | 39                 | .367                     |
| Paranoid personality disorder               | 26                   | 19                                | 7   | 6                  | .631                     |
| Impulse control disorders                   | 55                   | 39                                | 15  | 13                 | .472                     |
| SUD, any                                    | 228                  | 168                               | 55  | 52                 | .323                     |
| -Alcohol SUD                                | 130                  | 89                                | 40  | 30                 | .006                     |
| -Sedatives SUD                              | 130                  | 92                                | 37  | 30                 | .042                     |
| -Amphetamine SUD                            | 130                  | 89                                | 39  | 30                 | .008                     |
| -Hallucinogen SUD                           | 90                   | 61                                | 28  | 21                 | .030                     |
| -Cannabis SUD                               | 208                  | 155                               | 48  | 48                 | 1.0                      |
| -Cocaine SUD                                | 106                  | 82                                | 24  | 25                 | .883                     |
| -Metadon                                    | 38                   | 23                                | 15  | 9                  | .021                     |
| Extremely destructive abuse (drugs/alcohol) | 58                   | 34                                | 24  | 14                 | .001                     |
| Borderline intellectual functioning         | 53                   | 35                                | 17  | 12                 | .100                     |

Note: all *p*-values from Fischer's Exact test. All diagnoses consider lifetime occurrence, if not otherwise specified.

<https://doi.org/10.1371/journal.pone.0182258.t001>

Frequencies presented in Table 1 refers to the total frequencies of mental disorders in the group, therefore the count of DSH yes/no in Table 1 may differ from the total frequencies of mental disorders in the same table due to missing data for some variables. Data for Aim 1 were processed using frequencies and descriptive tables; results are given for the general DSH variable as a whole, and for non-suicidal self-injuries and suicide attempts as separate parts. Aim 2 was analyzed using Fischer's Exact test, Mann-Whitney U test, and Student's *t*-test. Some clinical variables, e.g., borderline personality disorder (*n* = 13), eating disorders (*n* = 3), dissociative syndromes (*n* = 2), and intermittent explosivity (*n* = 10) could not be analyzed within the second aim because of low prevalence in the sample. Aim 3 was investigated using binary logistic regression in two models, simple and multiple, and the multiple model included only potential risk factors/important confounders described in previous studies. As a final step, a multiple model controlling for age was performed. The predictors were screened for multicollinearity with acceptable variance inflation factor values and tolerance. Sensitivity, specificity, and positive predictive value (accuracy) was calculated for childhood ADHD and early life adversities (continuous measure). All bivariate analyses were performed with the general DSH variable as dependent variable.

### Ethical considerations

All offenders provided informed, written consent before participation, and were given the opportunity to receive feedback on the preliminary results from the assessments. Offenders showing indications of severe psychopathology were then given the opportunity to be referred to the prison psychiatrist for continued assessment and treatment. The study, including the

monetary reward (which was low in order not to give an incentive that would compromise the free consent), was approved by the Research Ethics Committee at Lund University.

## Results

### Prevalence and character of DSH among young violent offenders

Among the 270 young offenders, a total of 62 (23%) had engaged in DSH at some point. Specifically, 17 offenders stated repetitive self-harming acts (five or more occasions) while 20 offenders had harmed themselves on fewer than five occasions. Four participants reported having harmed themselves, but did not report the number of occasions. Forty-eight offenders (18%) reported suicide attempts: 22 had made one suicide attempt, 25 had made multiple (2–6) attempts, and one participant reported as much as 15 suicide attempts. Among the 48 suicide attempters, only 6 offenders expected the consequence of the attempt to be death. Just as many ( $n = 6$ ) reported performing the suicide attempt with no or little intention to die, or as a manipulative behavior. The majority of suicide attempters ( $n = 35$ ) reported an ambivalent intention. Mean age at onset of self-harming was 16 ( $Mdn = 16$ ,  $SD = 3.4$ ; range 5–22) and at onset of suicidal behavior was 17 ( $Mdn = 17$ ,  $SD = 3.6$ ; range 9–25) years.

### Characteristics associated with DSH among young violent offenders

**Clinical.** Table 1 displays associations (Fischer's Exact test) between mental disorders and DSH, showing that the majority of the DSH participants were diagnosed with mood disorders (89%) and/or anxiety disorders (82%) at some point during their lifetime. Also, differing types of SUD and adult ADHD were associated with DSH. When attention deficit (AD) and hyperactivity disorder (HD) symptoms were analyzed separately as continuous variables using Mann-Whitney U test, DSH participants had significantly more childhood AD symptoms ( $p = .022$ , Cohen's  $d = 0.29$ ), adult AD symptoms ( $p = .016$ , Cohen's  $d = 0.30$ ), and adult HD symptoms ( $p = .02$ , Cohen's  $d = 0.28$ ) than those who did not self-harm. There was no significant difference in childhood HD symptoms between DSH participants ( $M = 5.5$ ,  $SD = 2.9$ ) and non-DSH participants ( $M = 4.8$ ,  $SD = 2.8$ ),  $p = .104$  (Cohen's  $d = 0.21$ ).

**Cognitive functioning.** Cognitive abilities were compared between DSH participants and non-DSH participants, and no significant differences were found in GAI,  $t(1,260) = 1.91$ ,  $p = .06$ , or VCI,  $t(1,260) = 1.02$ ,  $p = .31$ . However, DSH participants had significantly lower scores on the POI scale than the non-DSH participants,  $t(1,260) = 2.50$ ,  $p = .01$  (Cohen's  $d = 0.31$ ).

**Psychosocial.** Significantly more DSH than non-DSH participants reported having been bullied at school, while no such conclusion could be drawn from participants who bullied others at school ( $p = .000$  and  $p = .104$ , respectively). Having been exposed to violence on repeated occasions during childhood was also significantly related to DSH ( $p = .001$ ). There was no significant association between number of placements at correctional institutions at a young age and DSH ( $p = .280$ , Cohen's  $d = .47$ ). When early adverse experiences (exposed to violence on repeated occasions, placed in an institution, parent deceased, parent with SUD or other serious disease) were merged into a dimensional measure of psychosocial adversities during childhood or adolescence, an increased number of such experiences were related to DSH ( $p = .001$ , Cohen's  $d = .39$ ).

**Criminological variables.** There were no significant differences between the two groups regarding criminological variables including different types of violent criminality. However, those who had been the subject of forensic psychiatric care reported more DSH ( $p = .003$ ). Assaulting one's parents during childhood was also associated with DSH ( $p = .013$ ). Participants with DSH had a higher LHA total score ( $p = .001$ ) than those without DSH; however, this might be because the LHA subscale Self-directed aggression was significantly related to

Table 2. Predictors of deliberate self-harm behavior (simple logistic regression).

| Predictor                                             | B    | S.E. | Wald  | p    | Odds Ratio | 95.0% C.I. for Odds Ratio |       |
|-------------------------------------------------------|------|------|-------|------|------------|---------------------------|-------|
|                                                       |      |      |       |      |            | Lower                     | Upper |
| Alcohol SUD                                           | .84  | .30  | 7.90  | .005 | 2.3        | 1.92                      | 4.19  |
| Cannabis SUD                                          | .03  | .34  | .01   | .911 | 1.04       | .05                       | 2.05  |
| Sedative SUD                                          | .61  | .29  | 4.21  | .040 | 1.84       | 1.02                      | 3.30  |
| Amphetamine SUD                                       | .81  | .30  | 7.21  | .007 | 2.25       | 1.24                      | 4.06  |
| Hallucinogen SUD                                      | .67  | .29  | 5.06  | .024 | 1.96       | 1.09                      | 3.52  |
| Metadon SUD                                           | .91  | .37  | 6.11  | .013 | 2.49       | 1.20                      | 5.15  |
| Neurodevelopmental disorders                          | .60  | .33  | 3.21  | .073 | 1.83       | .94                       | 3.55  |
| Borderline intellectual functioning                   | .58  | .34  | 2.89  | .089 | 1.79       | .91                       | 3.51  |
| ADHD childhood any                                    | .62  | .32  | 3.67  | .055 | 1.86       | .98                       | 3.51  |
| ADHD adulthood any                                    | .82  | .29  | 7.77  | .005 | 2.28       | 1.27                      | 4.08  |
| Anxiety disorders                                     | 1.80 | .36  | 24.77 | .000 | 6.06       | 2.98                      | 12.32 |
| Mood disorders                                        | 2.28 | .42  | 28.94 | .000 | 9.86       | 4.28                      | 22.71 |
| Childhood exposure to violence at home, repeated occ. | 1.06 | .31  | 11.48 | .001 | 2.89       | 1.56                      | 5.34  |
| Violent offenses total                                | -.57 | .35  | 2.59  | .107 | .56        | .28                       | 1.13  |
| Bullied during school years                           | 1.36 | .31  | 18.95 | .000 | 3.91       | 2.11                      | 7.22  |
| Number of psychosocial adversities                    | .38  | .12  | 9.72  | .002 | 1.47       | 1.15                      | 1.87  |
| Violence against parents repeated occ.                | .84  | .34  | 6.13  | .013 | 2.32       | 1.19                      | 1.89  |

<https://doi.org/10.1371/journal.pone.0182258.t002>

DSH at  $p = .000$  and the other subscales, aggression and antisocial behavior ( $p = .235$  and  $p = .403$ , respectively), were not.

**Predictors of DSH.** Simple (Table 2) and multiple (Table 3) logistic regressions were performed with one controlling for age at participation. Calculating sensitivity and specificity, childhood ADHD correctly classified 76.4% of all participants with a sensitivity of 0% and a specificity of 100%, resulting in a positive predictive value of 0%. The amount of variance explained by the model was 2%. For early life adversities, the model correctly classified 76.6% of all participants with a sensitivity of 0% and a specificity of 100%, resulting in a positive predictive value of 0%. The amount of variance explained by the model was 4–6%. In the multiple model, only anxiety disorders, mood disorders, and having been bullied at school remained significant predictors of DSH.

## Discussion

This study reports findings on associations of DSH with clinical, neurocognitive, psychosocial, and criminological factors in a group of male violent offenders in Sweden, 18–25 years old.

Table 3. Predictors of deliberate self-harm behavior (multivariate logistic regression).

| Predictor                                             | Odds Ratio (95% C.I.) | p    | Adjusted Odds Ratio (95% C.I.) <sup>a</sup> | p    |
|-------------------------------------------------------|-----------------------|------|---------------------------------------------|------|
| SUD                                                   | 1.096 (.39–3.04)      | .860 | 1.087 (.39–3.04)                            | .873 |
| ADHD adulthood, any                                   | 1.327 (.67–1.63)      | .418 | 1.413 (.70–2.83)                            | .331 |
| Anxiety disorders                                     | 3.087 (1.38–6.92)     | .006 | 2.811 (1.23–6.40)                           | .014 |
| Mood disorders                                        | 4.950 (2.02–12.14)    | .000 | 4.991 (2.01–12.35)                          | .001 |
| Bullied during school years                           | 3.123 (1.53–6.36)     | .002 | 3.270 (1.59–6.71)                           | .001 |
| Childhood exposure to violence at home, repeated occ. | 1.370 (.67–2.79)      | .386 | 1.280 (.62–2.63)                            | .502 |

<sup>a</sup> Adjusted for age

<https://doi.org/10.1371/journal.pone.0182258.t003>

The prevalence of DSH in this study was 23% ( $n = 62$ ), with a mean age of onset in the late adolescent years. DSH was mainly associated with mood disorders, anxiety disorders, AD symptoms, repeated exposure to violence during childhood, and having been bullied during childhood. Among the 62 self-harming offenders, many reported a repetitive DSH behavior and only 6 offenders admitted their DSH act had a suicidal intent. This study provides evidence of an increased prevalence of DSH in people exhibiting interpersonal aggressive behaviors and of DSH as an indicator of psychological ill-health not only in women, but also in men.

### Prevalence and character of DSH among young violent offenders

Previous studies on non-clinical populations with a comparable sample size have estimated the prevalence of DSH at 4% to 13% [5, 45]. Studies showing a higher prevalence have used the NSSI definition, which does not include suicide attempts. In this study, an increased prevalence of DSH was found with a total of 62 (23%) deliberately self-harming offenders. The majority of offenders reported a repetitive DSH behavior, which is not consistent with previous studies in the general population where only a minority (10%) repeated DSH behavior [4]. This finding is not entirely unanticipated since this group distinguishes itself from the general population in several ways e.g., growing up under severe circumstances [33], something that previously has been linked to increased risk of DSH [25, 26, 27]. The mean age of onset is comparable to that in the general population, although in some cases in our study DSH was reported in the early childhood years, further indicating unstable circumstances and mental ill-health during childhood.

### Characteristics associated with DSH among young violent offenders

**Clinical.** There was a significant positive association between mood and anxiety disorders and DSH in accord with previous research [46]. In the group of DSH participants ( $n = 62$ ), 82% ( $n = 50$ ) suffered from some kind of anxiety disorder and 89% ( $n = 55$ ) from a mood disorder. Self-harm has previously been described as an emotion regulator and as an act of tension release that, for a limited time, eases an individual's temporary distress [47]. A study of a comparable group of 173 male prisoners concluded that 31.6% of the prisoners used DSH to obtain anxiety release and 21% to release anger [27], which both fall under Gratz's definition of emotion regulation [47]. In the present study, mood disorders and anxiety disorders predicted the risk of engaging in DSH by 9.9 and 6.1 times, respectively, with statistical significance. Childhood ADHD was not a significant predictor of DSH, and did not result in a sensitive prediction model in this group of offenders. Taking into account possible confounders in a multiple logistic regression (Table 3), the increases in risk remained significant, but decreased to 3.1 and 4.9 times, respectively. Controlling for age at participation only resulted in minor differences, not considered as clinically relevant. Since motives for DSH were not investigated beyond whether or not there was suicidal intent, the study offers no conclusions on the functions of the behavior. DSH is often related to borderline personality disorder [48]; however, due to the low prevalence of borderline personality disorder among the participants in this study, this association could not be tested. However, DSH was found to be related to symptoms of both AD and HD, in line with previous research [29], indicating a relationship with disinhibited behavior and attention deficits. However, since very high rates of mood disorders and anxiety disorders were noted among the DSH offenders, the question is whether the observed attention difficulties might be due, at least in part to comorbid depression or anxiety. Contrary to previous findings, conduct disorder was not related to DSH in the present study. This finding could be due to the high prevalence of conduct disorder in the sample, providing too little variation in the analyses.



Alcohol use disorder was significantly more prevalent among DSH offenders, in line with previous research findings showing alcohol use disorder as a risk factor for suicide [49]. Other authors have discussed the combination of depression and alcohol and its prediction of suicide [50]. From results of the present study, we argue that DSH is associated to alcohol abuse; however, it is not possible to distinguish whether alcohol use disorder is causally related to DSH or if it acts as a moderator. However, other studies have linked DSH acts directly to episodes of alcohol use [51]. In the simple logistic regressions, all SUD except cannabis could significantly predict DSH with odds ratios from 2.0 to 2.5. The risk of engaging in DSH was twice as high for offenders with any SUD. In contrast to other studies [52, 53] DSH could not be predicted by cannabis SUD. This might be due to lack of variation in this sample as the majority (77%) of the offenders had cannabis SUD. Whereas previous studies have established the association between cannabis and DSH, the results of the present study show that this association may not be causal, and that instead, one should consider what other underlying risk factors cannabis and DSH share.

**Cognitive functioning.** In this study, DSH was not related to general intellectual ability. However, DSH participants scored significantly lower on the POI scale than offenders without DSH, indicating possible deficiencies in visual tracking, perceptual organization, and reasoning among offenders with DSH. These findings could possibly be associated with problems of visual attention, as indicated by the increased prevalence of AD symptoms among the DSH participants. Whether this is due to actual visuo-perceptive dysfunction or comorbid mental illnesses affecting attention (e.g., anxiety and depression), remains to be investigated in future research.

**Psychosocial.** Research has shown that participants who have experienced abuse during childhood are more likely to report suicide attempts [54]. However, in other studies, individuals who have attempted suicide have shown significantly higher rates of impulsivity and aggression, and the question remains whether being abused during childhood or underlying traits of aggression and impulsivity construct a risk of DSH [55]. Impulsivity is one of the traits in the HD symptoms which were also significantly associated to DSH in this study. This shows how complex the relationships between factors are, and causal associations are almost impossible to detect at group level. In the present study, 52% of the offenders had been exposed to violence during childhood [33]. Violence in the early years is considered a trauma [25], which is a strong predictor of DSH [26]. In this study, repeated exposure to violence during childhood was significantly more prevalent in the DSH group. When the variable exposure to violence at home was analyzed singularly in a simple logistic regression, the prediction was highly significant ( $p = .001$ ), but when the other factors were taken into account (see Table 3), exposure to violence was no longer a significant predictor. However, the dose-response relationship between early adverse experiences and DSH in the results indicates that although other variables were more important predictors of DSH in this sample, increased number of psychosocial adversities during childhood were linked to adverse outcomes in adulthood, including DSH. Yet, in this group of offenders, only using early life adversities as a predictor did not result in a sensitive model why one should consider more than only this factor when predicting DSH.

## Limitations

It is unwise to draw conclusions about the role of DSH in offenders' mental health from this study since there is little variation in the sample, which is not representative of the general population either. Thus, generalizations should be made with care and preferably only about young male violent offenders. Also, the low prevalence of some disorders commonly associated with

DSH made it impossible to test their associations with DSH in this sample. Finally, the effect sizes of associations detected were small to medium, indicating that the tested variables are only part of the puzzle of why some people direct their aggressive behaviors toward themselves as well as others.

## Clinical implications

This study shows that violent offenders are more likely than the general population to direct their aggressive behaviors not only toward other people, but also toward themselves. Many of those offenders who harm themselves do so on multiple occasions, although often without a firm intention of committing suicide. However, it is clear from their suicidal acts that whether or not they truly wish to kill themselves, many of the offenders displaying DSH are at very high risk of dying by suicide at some point. The age of onset of DSH in the current study group, in combination with how many of them were placed in institutions during childhood or adolescence, indicates that DSH should be constantly assessed and managed in youth correctional institutions and prison and probation services. Even if DSH does not predict completed suicide in all DSH individuals, it must be taken seriously as an indicator of mental health problems among young violent offenders.

Possible models to prevent DSH among offenders, aside from treatment of mood disorders and anxiety disorders [45], could be substance use prevention programs. For the majority with SUD, this might have a beneficial effect on several risk factors simultaneously as such programs have been found to ameliorate not only SUD, but also mood and anxiety disorders [56]. Depending on the function of the self-harming behavior among offenders, which remains to be investigated, psychological treatments such as the Dialectical Behavior Therapy forensic model [57] might be suitable for those with emotion regulation deficiencies as it is essential that these individuals are taught strategies to regulate their emotions and communicate their feelings without harming their bodies. Emotional dysregulation is one theoretical common denominator for both DSH and overt aggression, where over-regulation or under-regulation of emotions might increase the risk of dysfunctional behavior such as DSH or aggression [58, 59]. A study of the function of DSH found that DSH is strongly associated with a shift in emotions, where the participants in the study felt overwhelmed, sad and frustrated before the self-harming act and relieved and calm after. [60] That is, the DSH acted as a coping strategy, providing relief from negative emotions [61, 62]. In a recent study, emotional dysregulation and trait impulsivity predicted both aggression and DSH [59], and there is also evidence for an interaction between emotional dysregulation, trait anger, and aggression [63]. Considering the participants in the current study, it is quite possible that emotional dysregulation might influence the occurrence of both DSH and aggression, even though this could not be investigated in the current study. With regard to their adverse psychosocial backgrounds and the fact that they are imprisoned at the time of the study, it is also plausible that the offenders had had only a few, if any, opportunities to develop more functional emotion regulation skills. Yet, the interactions between emotion regulation, DSH, and aggressive behavior remains to be investigated, and further knowledge on the function of both DSH and aggression in forensic populations is urgently needed in order to provide suitable preventive interventions against these harmful behaviors.

## Acknowledgments

We gratefully acknowledge Lennart Palmgren and Svenolov Svensson for their generous support of the entire project; all site managers for their hard work during the assessments; Therese

Olsson, Viveca Spong, Natalia Theander, and Mattias Filipazzi for indispensable help with the database. Finally, we express our gratitude to all offenders for their participation.

## Author Contributions

**Formal analysis:** Natalie Laporte.

**Methodology:** Natalie Laporte, Andrejs Ozolins, Eva Billstedt, Björn Hofvander, Märta Wallinius.

**Project administration:** Eva Billstedt, Björn Hofvander.

**Supervision:** Andrejs Ozolins, Sofie Westling, Åsa Westrin, Märta Wallinius.

**Writing – original draft:** Natalie Laporte.

**Writing – review & editing:** Natalie Laporte, Andrejs Ozolins, Sofie Westling, Åsa Westrin, Eva Billstedt, Björn Hofvander, Märta Wallinius.

## References

1. Kinahan JC, MacHale S. The surgeon and self-harm: at the cutting edge. *The Surgeon* 2014; 12(6): 345–9. <https://doi.org/10.1016/j.surge.2014.03.002> PMID: 24742756
2. National Institute for Clinical Excellence: Self-harm: the short-term physical and psychological management and secondary prevention of self-harm in primary and secondary care. Clinical guideline 16. 2004. London, UK: Gaskell & British Psychological Society.
3. Cooper J, Kapur N, Webb R, Lawlor M, Guthrie E, Mackway-Jones K, et al. Suicide after deliberate self-harm: a 4-year cohort study. *Am J Psychiatry* 2005; 162(2): 297–303. <https://doi.org/10.1176/appi.ajp.162.2.297> PMID: 15677594
4. Hawton K, James A. Suicide and deliberate self harm in young people. *BMJ* 2005; 330(7496): 891–4. <https://doi.org/10.1136/bmj.330.7496.891> PMID: 15831877
5. Hawton K, Rodham K, Evans E, Weatherall R. Deliberate self harm in adolescents: self report survey in schools in England. *BMJ* 2002; 325(7374): 1207–11. PMID: 12446536
6. McKenzie KC, Gross JJ. Nonsuicidal self-injury: an emotion regulation perspective. *Psychopathology* 2014; 47(4): 1–13.
7. Heath N, Schaub K, Shareen H, Nixon M. Self-injury today. Review of population and clinical studies in adolescents. In Nixon MK, Heath NL, eds. *Self-injury in youth: the essential guide to assessment and intervention*. 2008. New York, NY: Routledge Press.
8. Jacobson CM, Gould M. The epidemiology and phenomenology of non-suicidal self-injurious behavior among adolescents: a critical review of the literature. *Arch Suicide Res* 2007; 11(2): 129–47. <https://doi.org/10.1080/13811110701247602> PMID: 17453692
9. Hawton K, Saunders K, O'Connor R. Self-harm and suicide in adolescents. *Lancet* 2012; 379: 2373–82. [https://doi.org/10.1016/S0140-6736\(12\)60322-5](https://doi.org/10.1016/S0140-6736(12)60322-5) PMID: 22726518
10. Zetterqvist M, Lundh LG, Dahlström Ö, Svedin CG. Prevalence and function of non-suicidal self-injury (NSSI) in a community sample of adolescents, using suggested DSM-5 criteria for a potential NSSI disorder. *J Abnorm Child Psychol* 2013; 41(5): 759–73. <https://doi.org/10.1007/s10802-013-9712-5> PMID: 23344701
11. Bjärehed J. Characteristics of self-injury in young adolescents. Doctoral dissertation, Lund University. 2012.
12. Laye-Gindhu A, Schonert-Reichl KA. Nonsuicidal self-harm among community adolescents: understanding the “whats” and “whys” of self-harm. *J Youth Adolesc* 2005; 34(5): 447–57.
13. Hawton K, Rodham K, Evans E, Weatherall R. Deliberate self harm in adolescents: self report survey in schools in England. *BMJ* 2002; 325(7374): 1207–11. PMID: 12446536
14. World Health Organization. Preventing suicide: a global imperative. 2012. Available: [http://www.who.int/mental\\_health/suicide-prevention/world\\_report\\_2014/en/](http://www.who.int/mental_health/suicide-prevention/world_report_2014/en/).
15. Fazel S, Benning R, Danesh J. Suicides in male prisoners in England and Wales, 1978–2003. *Lancet* 2005; 366(9493): 1301–02. [https://doi.org/10.1016/S0140-6736\(05\)67325-4](https://doi.org/10.1016/S0140-6736(05)67325-4) PMID: 16214601

16. Fazel S, Grann M, Kling B, Hawton K. Prison suicide in 12 countries: an ecological study of 861 suicides during 2003–2007. *Soc Psychiatry Psychiatr Epidemiol* 2011; 46: 191–5. <https://doi.org/10.1007/s00127-010-0184-4> PMID: 20140663
17. Hawton K, Linsell L, Adeniji T, Sariaslan A, Fazel S. Self-harm in prisons in England and Wales: an epidemiological study of prevalence, risk factors, clustering, and subsequent suicide. *Lancet* 2014; 383(9923): 1147–54. [https://doi.org/10.1016/S0140-6736\(13\)62118-2](https://doi.org/10.1016/S0140-6736(13)62118-2) PMID: 24351319
18. Dooley E. Prison suicide in England and Wales, 1972–87. *Br J Psychiatry* 1990; 156(1): 40–5.
19. Fazel S, Cartwright J, Norman-Nott A, Hawton K. Suicide in prisoners: a systematic review of risk factors. *J Clin Psychiatry* 2008; 69(11), 1721–31. PMID: 19026254
20. Harris EC, Barraclough B. Suicide as an outcome for mental disorders. A meta-analysis. *Br J Psychiatry* 1997; 170(3): 205–28.
21. Beck AT, Kovacs M, Weissman A. Hopelessness and suicidal behavior: An overview. *JAMA* 1975; 234(11): 1146–9. PMID: 1242427
22. Zanarini MC., Frankenburg FR, DeLuca CJ, Hennen J, Khera GS, Gunderson J G. The pain of being borderline: dysphoric states specific to borderline personality disorder. *Harvard review of psychiatry* 1998; 6(4): 201–7. PMID: 10370445
23. Claes L, Vandereycken W. Self-injurious behavior: differential diagnosis and functional differentiation. *Compr Psychiatry* 2007; 48(2): 137–44. <https://doi.org/10.1016/j.comppsy.2006.10.009> PMID: 17292704
24. Plattner B, The SS, Kraemer HC, Williams RP, Bauer SM, Kindler J, et al. Suicidality, psychopathology, and gender in incarcerated adolescents in Austria. *J Clinical Psychiatry* 2007; 68(10):1593–600.
25. Brodsky BS, Stanley B. Adverse childhood experiences and suicidal behavior. *Psychiatr Clin North Am* 2008; 31(2): 223–35. <https://doi.org/10.1016/j.psc.2008.02.002> PMID: 18439446
26. Bruffaerts R, Demyttenaere K, Borges G, Haro JM, Chiu WT, Hwang I, et al. Childhood adversities as risk factors for onset and persistence of suicidal behaviour. *Br J Psychiatry* 2010; 197(1): 20–7. <https://doi.org/10.1192/bjp.bp.109.074716> PMID: 20592429
27. Sakelliadis EI, Papadodima SA, Sergeantanis TN, Giotakos O, Spiliopoulou CA. Self-injurious behavior among Greek male prisoners: prevalence and risk factors. *Eur Psychiatry* 2010; 25(3): 151–8. <https://doi.org/10.1016/j.eurpsy.2009.07.014> PMID: 19926259
28. Borschmann R, Coffey C, Moran P, Hearps S, Degenhardt L, Kinner SA, et al. Self-harm in young offenders. *Suicide Life Threat Behav* 2014; 44(6): 641–52. <https://doi.org/10.1111/sltb.12096> PMID: 24773535
29. Allely CS. The association of ADHD symptoms to self-harm behaviours: a systematic PRISMA review. *BMC Psychiatry* 2014; 14(1): 133.
30. Westling S, Ahrén B, Sunnqvist C, Träskman-Bendz L. Altered glucose tolerance in women with deliberate self-harm. *Psychoneuroendocrinology* 2009; 34(6): 878–83. <https://doi.org/10.1016/j.psyneuen.2008.12.015> PMID: 19188027
31. Cairns RB, Peterson G, Neckerman HJ. Suicidal behavior in aggressive adolescents. *J Clin Child Psychol* 1988; 17(4): 298–309.
32. Swahn MH, Bossarte RM, Sullivent EE. Age of alcohol use initiation, suicidal behavior, and peer and dating violence victimization and perpetration among high-risk, seventh-grade adolescents. *Pediatrics* 2008; 121(2): 297–305. <https://doi.org/10.1542/peds.2006-2348> PMID: 18245421
33. Wallinius M, Delfin C, Billstedt E, Nilsson T, Anckarsäter H, Hofvander B. Offenders in Emerging Adulthood: School Maladjustment, Childhood Adversities, and Prediction of Aggressive Antisocial Behaviors. *Law Hum Behav* 2016.
34. Billstedt E, Anckarsäter H, Wallinius M, Hofvander B. Neurodevelopmental disorders in young violent offenders: overlap and background characteristics. *Psy Res* 2017.
35. Hofvander B, Anckarsäter H, Wallinius M, Billstedt E. Young adult mental health in violent offenders: the importance of childhood onset conduct disorder. *Br J Psychiatry Open* 2017; 3(2): 78–84.
36. American Psychiatric Association (AMA). *Diagnostic and statistical manual of mental disorders, 4th ed. (DSM IV)*. Washington DC: AMA; 1994.
37. First MB, Gibbon M, Spitzer RL, Williams JBW. *Structured Clinical Interview for DSM-IV Disorders—Research Version (SCID-I, Version 2.0)*. New York: Biometrics Research Department, New York State Psychiatric Institute; 1996.
38. First M, Gibbon M, Spitzer RL, Williams JB, Smith Benjamin L. *Structured Clinical Interview for DSM-IV Axis II Personality Disorders (SCID-II)* Washington: American Psychiatric Press; 1997.

39. Gillberg C, Gillberg C, Råstam M, Wentz E. The Asperger Syndrome (and high-functioning autism) Diagnostic Interview (ASDI): a preliminary study of a new structured clinical interview. *Autism* 2001; 5 (1): 57–66. <https://doi.org/10.1177/1362361301005001006> PMID: 11708390
40. Nilsson T, Wallinius M, Gustavson C, Anckarsäter H, Kerekes N. Violent recidivism: a long-time follow-up study of mentally disordered offenders. *PloS one* 2011; 6(10): e25768. <https://doi.org/10.1371/journal.pone.0025768> PMID: 22022445
41. Tulsy DS, Saklofske DH, Wilkins C, Weiss LG. Development of a General Ability Index for the Wechsler Adult Intelligence Scale—Third Edition. *Psychological Assessment* 2001; 13(4): 566. PMID: 11793899
42. Wechsler D. Wechsler Adult Intelligence Scale- Third edition. Swedish version. Stockholm: Psykologiförlaget; 2003.
43. Brown GL, Ebert MH, Goyer PF, Jimerson DC, Klein WJ, Bunney WE, et al. Aggression, suicide, and serotonin: Relationships to CSF amine metabolites. *Am J Psychiatry* 1982; 139: 741–6. <https://doi.org/10.1176/ajp.139.6.741> PMID: 6177256
44. Coccaro EF, Berman ME, Kavoussi RJ. Assessment of life history of aggression: development and psychometric characteristics. *Psychiatry res* 1997; 73(3): 147–57. PMID: 9481806
45. Klonsky ED, Oltmanns TF, Turkheimer E. Deliberate self-harm in a nonclinical population: prevalence and psychological correlates. *Am J Psychiatry* 2003; 160(8): 1501–8. <https://doi.org/10.1176/appi.ajp.160.8.1501> PMID: 12900314
46. Haw C, Hawton K, Houston K, Townsend E. Psychiatric and personality disorders in deliberate self-harm patients. *Br J Psychiatry* 2001; 178(1): 48–54. PMID: 11136210
47. Gratz KL, Tull MT. Emotion regulation as a mechanism of change in acceptance-and mindfulness-based treatments. In: Baer RA, ed. *Assessing mindfulness and acceptance processes in clients: illuminating the theory and practice of change*. Oakland, CA: Context Press/NewHarbinger Publications; 2010: pp. 107–133.
48. Sansone RA, Wiederman MW, Sansone LA. The Self-Harm Inventory (SHI): development of a scale for identifying self-destructive behaviors and borderline personality disorder. *J Clin Psychol* 1998; 54(7): 973–83. PMID: 9811134
49. Conner KR, Duberstein PR. Predisposing and precipitating factors for suicide among alcoholics: empirical review and conceptual integration. *Alcohol Clin Exp Res* 2004; 28(s1): 6S–17S.
50. Murphy GE, Wetzel RD. The lifetime risk of suicide in alcoholism. *Arch Gen Psychiatry* 1990; 47(4): 383–92. PMID: 2181963
51. Rossow I, Ystgaard M, Hawton K, Madge N, Van Heeringen K, De Wilde EJ. Cross-national comparisons of the association between alcohol consumption and deliberate self-harm in adolescents. *Suicide Life Threat Behav* 2007; 37(6): 605–15. <https://doi.org/10.1521/suli.2007.37.6.605> PMID: 18275367
52. Moller CI, Tait RJ, Byrne DG. Deliberate self-harm, substance use, and negative affect in nonclinical samples: a systematic review. *Subst Abuse* 2013; 34(2): 188–207.
53. Rossow I, Hawton K, Ystgaard M. Cannabis use and deliberate self-harm in adolescence: a comparative analysis of associations in England and Norway. *Arch Suicide Res* 2009; 13(4): 340–8. <https://doi.org/10.1080/13811110903266475> PMID: 19813111
54. Miller AB, Esposito-Smythers C, Weismore JT, Renshaw KD. The relation between child maltreatment and adolescent suicidal behavior: a systematic review and critical examination of the literature. *Clin Child Fam Psychol Rev* 2013; 16(2): 146–72. <https://doi.org/10.1007/s10567-013-0131-5> PMID: 23568617
55. Brodsky BS, Oquendo M, Ellis SP, Haas GL, Malone KM, Mann JJ. The relationship of childhood abuse to impulsivity and suicidal behavior in adults with major depression. *Am J Psychiatry* 2001; 158(11): 1871–7. <https://doi.org/10.1176/appi.ajp.158.11.1871> PMID: 11691694
56. Grant BF, Goldstein RB, Chou SP, Huang B, Stinson FS, Dawson DA. Sociodemographic and psychopathologic predictors of first incidence of DSM-IV substance use, mood and anxiety disorders: results from the Wave 2 National Epidemiologic Survey on Alcohol and Related Conditions. *Mol Psychiatry* 2009; 14(11): 1051–66. <https://doi.org/10.1038/mp.2008.41> PMID: 18427559
57. McCann RA, Ball EM, Ivanoff A. DBT with an inpatient forensic population: the CMHIP forensic model. *Cogn Behav Pract* 2000; 7(4): 447–56.
58. Robertson T, Daffern M, Bucks RS. Emotion regulation and aggression. *Aggression and violent behavior* 2012; 17(1): 72–82.
59. Terzi L, Martino F, Berardi D, Bortolotti B, Sasdelli A, Menchetti M. Aggressive behavior and self-harm in Borderline Personality Disorder: The role of impulsivity and emotion dysregulation in a sample of out-patients. *Psychiatry Res* 2017 Mar; 249: 321–326. <https://doi.org/10.1016/j.psychres.2017.01.011> PMID: 28152466

60. Klonsky ED. The functions of self-injury in young adults who cut themselves: Clarifying the evidence for affect-regulation. *Psychiatry res* 2009; 166(2): 260–268.
61. Brown MZ, Comtois KA, Linehan MM. Reasons for suicide attempts and nonsuicidal self-injury in women with borderline personality disorder. *J Abnorm Psychol* 2002; 111: 198–202. PMID: [11866174](#)
62. Chapman AL, Dixon-Gordon KL. Emotional antecedents and consequences of deliberate self-harm and suicide attempts. *Suicide Life Threat Behav* 2007; 37: 543–552. <https://doi.org/10.1521/suli.2007.37.5.543> PMID: [17967121](#)
63. Mancke F, Herpertz SC, Kleindienst N, Bertsch K. Emotion Dysregulation and trait anger sequentially mediate the association between borderline personality disorder and aggression. *J personality dis* 2016; 1–17.
